# Supplementary material for: Factors Associated with Increased or Decreased Stress Level in French Children during the First COVID-19 Lockdown
Source: MDPI journal article supplement (doi:10.3390/ijerph20054667), 2023-03-06
Supplement: s1 [file s1]

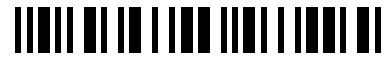

**Bonjour,**

**Merci beaucoup d'avoir accepté de participer à ce questionnaire !**

**Comme tu le sais, le Président de la République a annoncé la fermeture de toutes les écoles à partir du lundi 16 mars. C'était une mesure importante pour limiter le risque de contagion du coronavirus. Depuis, tu continues pourtant à recevoir des enseignements, et tes professeurs se sont organisés pour que l'apprentissage continue malgré le confinement.**

**Pendant ces 2 mois qui n'étaient pas comme d'habitude, il y a certainement des choses qui t'ont inquiété(e), et d'autres que tu as apprécié.**

**Le Premier Ministre a maintenant annoncé la reprise progressive de l'école à partir du lundi 11 mai. De la même manière, il y a certainement des choses qui t'inquiètent et d'autres qui te font plaisir autour de cette reprise scolaire.**

**Dans ce questionnaire, ce sont ces différents aspects de tes ressentis que nous cherchons à mieux identifier, en lien avec ta personnalité et ton contexte de vie.**

**Le questionnaire que tu vas passer te prendra environ 10 ou 15 minutes. La première partie des questions s'adresse à toi, tandis que la seconde pourra être remplie par tes parents. Il s'agit d'un questionnaire anonymisé, si bien que tes réponses ne peuvent pas être connues par tes professeurs ni par d'autres personnes.**

**A la fin du questionnaire nous te donnerons quelques conseils sur les impacts psychologiques de l'épidémie, dont tu pourras également discuter avec tes parents.**

**Bon questionnaire !**

**NB : Ce questionnaire est réalisé par l'équipe du service de psychopathologie de l'HFME (Pr Fournernet) et par le Centre Régional de Psychotraumatisme de l'hôpital Edouard Herriot (Dr Prieto). Pour toute question au sujet de ce questionnaire, toi ou tes parents pouvez écrire à l'adresse suivante : [pauline.espi@chu-lyon.fr](mailto:pauline.espi@chu-lyon.fr)**

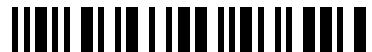

## Partie A: Accord parental

**A1.** En cliquant sur OUI, vous acceptez la participation de votre enfant au questionnaire.

Les données sont anonymisées et stockées sur un serveur sécurisé, si bien qu'il n'est pas possible de remonter à votre identité.

Oui ☐

Non ☐

## Partie B: Données socio-démographiques générales

**B1.** Es-tu une fille ou un garçon ?

Fille ☐

Garçon ☐

**B2.** Dans quelle classe es-tu ?

CP ☐

CE1 ☐

CE2 ☐

CM1 ☐

CM2 ☐

6ème ☐

5ème ☐

4ème ☐

3ème ☐

Seconde ☐

Première ☐

Terminale ☐

**B3.** Dans quel type d'établissement scolaire es-tu ?

Etablissement public ☐

Etablissement privé ☐

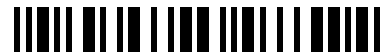

**B4. Dans quelle ville habites-tu ?**

**B5. Quelle est la profession de tes parents ?**

## Partie C: Contexte de vie

**C1. Quels membres de ta famille étaient à la maison avec toi pendant le confinement ?**

Mère ☐

Père ☐

Belle-mère ou beau-père ☐

Frère(s) ou soeur(s) ☐

Grands-parents ☐

Animal de compagnie ☐

Autre ☐

**C2. Autre :**

**C3. Dans quel logement vivais-tu pendant le confinement ?**

Maison avec jardin ☐

Maison sans jardin ☐

Appartement avec balcon ou terrasse ou cour ☐

Appartement sans balcon ou terrasse ou cour ☐

Avec une pièce pour toi seul(e) ☐

Sans pièce pour toi seul(e) ☐

**C4. Que faisais-tu comme activités pendant le confinement, en plus de tes devoirs ?**

Activité physique ou jeux à l'extérieur ☐

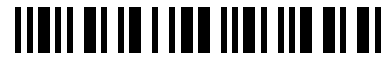

Jouer avec les animaux ☐

Jardinage ☐

Cuisine ☐

Jeux de société ☐

Lecture ☐

Dessiner ☐

Jeux vidéos ☐

Pratique d'un instrument de musique ☐

Discussion avec tes amis ☐

Autre ☐

**C5. Autre :**

**C6. Combien de temps environ passais-tu devant les écrans par jour (téléphone, TV, ordinateur) ?**

|                  | Moins de<br>30<br>minutes | Entre 30<br>minutes et<br>1h | Entre 1h<br>et 2h        | Entre 2h<br>et 4h        | Plus de 4h               |
|------------------|---------------------------|------------------------------|--------------------------|--------------------------|--------------------------|
| Pour tes devoirs | <input type="checkbox"/>  | <input type="checkbox"/>     | <input type="checkbox"/> | <input type="checkbox"/> | <input type="checkbox"/> |
| Pour tes loisirs | <input type="checkbox"/>  | <input type="checkbox"/>     | <input type="checkbox"/> | <input type="checkbox"/> | <input type="checkbox"/> |

**C7. Est-ce que les horaires de ton sommeil et de tes repas étaient modifiés pendant le confinement ?**

|                             | Similaires à<br>d'habitude | Un peu<br>modifiés       | Beaucoup<br>modifiés     | Complète-<br>ment<br>irréguliers |
|-----------------------------|----------------------------|--------------------------|--------------------------|----------------------------------|
| Horaires de coucher - lever | <input type="checkbox"/>   | <input type="checkbox"/> | <input type="checkbox"/> | <input type="checkbox"/>         |
| Horaires des repas          | <input type="checkbox"/>   | <input type="checkbox"/> | <input type="checkbox"/> | <input type="checkbox"/>         |

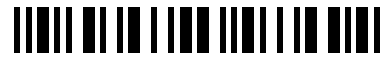

## Partie D: Sclolarité pendant le confinement

**D1. Est-ce que tu t'es senti plus stressé ou moins stressé que d'habitude pendant le confinement ?**

|                        |                          |
|------------------------|--------------------------|
| Beaucoup moins stressé | <input type="checkbox"/> |
| Un peu moins stressé   | <input type="checkbox"/> |
| Pareil que d'habitude  | <input type="checkbox"/> |
| Un peu plus stressé    | <input type="checkbox"/> |
| Beaucoup plus stressé  | <input type="checkbox"/> |

**D2. Est-ce que tu avais des inquiétudes en lien avec l'épidémie de coronavirus ?**

|                                                            | Pas du tout              | Un peu                   | Beaucoup                 | Enormément               |
|------------------------------------------------------------|--------------------------|--------------------------|--------------------------|--------------------------|
| J'étais inquiet de tomber malade                           | <input type="checkbox"/> | <input type="checkbox"/> | <input type="checkbox"/> | <input type="checkbox"/> |
| J'étais inquiet que des membres ma famille tombent malades | <input type="checkbox"/> | <input type="checkbox"/> | <input type="checkbox"/> | <input type="checkbox"/> |
| J'étais inquiet que le confinement dure longtemps          | <input type="checkbox"/> | <input type="checkbox"/> | <input type="checkbox"/> | <input type="checkbox"/> |
| J'étais inquiet pour mes apprentissages scolaires          | <input type="checkbox"/> | <input type="checkbox"/> | <input type="checkbox"/> | <input type="checkbox"/> |

**D3. Est-ce qu'il y a des choses que tu as apprécié pendant le confinement ?**

|                                                                                               |                          |
|-----------------------------------------------------------------------------------------------|--------------------------|
| J'ai eu le sentiment d'apprendre à travailler davantage tout(e) seul(e)                       | <input type="checkbox"/> |
| J'ai eu le sentiment de mieux travailler car je m'organisais comme je voulais                 | <input type="checkbox"/> |
| J'ai ressenti moins de pression en lien avec mes résultats scolaires                          | <input type="checkbox"/> |
| J'ai bien aimé passer plus de temps avec ma famille                                           | <input type="checkbox"/> |
| J'étais soulagé(e) d'être moins confronté(e) aux bagarres et moqueries avec les autres élèves | <input type="checkbox"/> |
| Je me suis sentie apaisé(e) d'être en dehors du groupe des élèves                             | <input type="checkbox"/> |
| Autre                                                                                         | <input type="checkbox"/> |

**D4. Autre :**

**D5. Est-ce qu'il y a des choses que tu n'as pas apprécié pendant le confinement ?**

|                                                            |                          |
|------------------------------------------------------------|--------------------------|
| J'ai eu le sentiment de moins bien travailler qu'à l'école | <input type="checkbox"/> |
|------------------------------------------------------------|--------------------------|

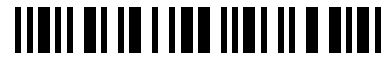

J'ai eu le sentiment de ne pas réussir à me motiver pour mon travail scolaire ☐

J'étais triste de ne plus voir mes amis ☐

Je me suis sentie seul(e) ☐

J'ai eu l'impression qu'il y avait davantage de tensions et de disputes à la maison ☐

Je me suis ennuyé(e) ☐

Autre ☐

**D6. Autre :**

**D7. As-tu eu le sentiment que tes parents t'aidaient et t'accompagnaient dans tes travaux scolaires pendant le confinement ?**

Pas du tout ☐

Un peu ☐

Beaucoup ☐

Enormément ☐

## Partie E: Reprise scolaire

**E1. As-tu envie de retourner à l'école lorsque ton établissement va ré-ouvrir (ou s'il a déjà ré-ouvert) ?**

Oui ☐

Non ☐

Avec certaines conditions ☐

**E2. Quand tu penses à la reprise de l'école, est-ce que tu as des inquiétudes ?**

Pas du tout      Un peu      Beaucoup      Enormément

Je suis inquiet d'être contaminé par le coronavirus ☐ ..... ☐ ..... ☐ ..... ☐

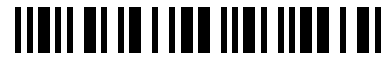

Pas du tout      Un peu      Beaucoup      Enormément

Je suis inquiet de devoir faire les gestes barrières

☐ ..... ☐ ..... ☐ ..... ☐

Je suis inquiet de ramener le virus à la maison

☐ ..... ☐ ..... ☐ ..... ☐

Je suis inquiet d'avoir pris du retard sur mes apprentissages

☐ ..... ☐ ..... ☐ ..... ☐

Je suis triste de devoir me séparer de nouveau de ma famille

☐ ..... ☐ ..... ☐ ..... ☐

**E3. Quand tu penses à la reprise de l'école, est-ce qu'il y a des choses qui te font plaisir ?**

Pas du tout      Un peu      Beaucoup      Enormément

Je suis content(e) de retrouver mes amis

☐ ..... ☐ ..... ☐ ..... ☐

Je suis content(e) de retrouver mes professeurs

☐ ..... ☐ ..... ☐ ..... ☐

Je suis soulagé(e) de pouvoir sortir de la maison et de pouvoir bouger

☐ ..... ☐ ..... ☐ ..... ☐

Je suis soulagé(e) de m'éloigner de ma famille pendant la journée

☐ ..... ☐ ..... ☐ ..... ☐

Je suis soulagée d'être de nouveau guidé(e) dans mon travail scolaire

☐ ..... ☐ ..... ☐ ..... ☐

Je suis content(e) de reprendre des activités plus variées

☐ ..... ☐ ..... ☐ ..... ☐

**E4. Es-tu retourné au moins une fois à l'école depuis le 11 mai ?**

Oui ☐

Non ☐

**E5. Qu'est-ce que tu ressens à propos des gestes barrières qui sont mis en place dans ton école ?**

Pas du tout      Un peu      Beaucoup      Enormément

Quand ils portent des masques, les adultes (professeurs, surveillants) me font peur

☐ ..... ☐ ..... ☐ ..... ☐

Je suis triste de ne plus pouvoir toucher mes camarades

☐ ..... ☐ ..... ☐ ..... ☐

Je me sens seul dans la cour de récréation car je n'ai pas droit de m'approcher des autres élèves

☐ ..... ☐ ..... ☐ ..... ☐

J'ai peur que les autres (camarades ou professeurs) s'approchent de moi

☐ ..... ☐ ..... ☐ ..... ☐

Je me sens inquiet en permanence quand je suis à l'école

☐ ..... ☐ ..... ☐ ..... ☐

Je me sens rassuré par ces gestes-barrières car ils luttent contre l'épidémie

☐ ..... ☐ ..... ☐ ..... ☐

J'ai le sentiment de réussir à faire correctement les gestes-barrières

☐ ..... ☐ ..... ☐ ..... ☐

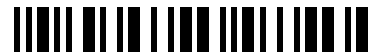

## Partie F: Ton tempérament

**F1.** Voici plusieurs propositions qui cherchent à mieux préciser ton tempérament. Essaie d'indiquer pour chaque proposition si, pour toi, elle est plutôt vraie ou plutôt fausse.

|                                                                      | Totalement faux          | Plutôt faux              | Plutôt vrai              | Totalement vrai          |
|----------------------------------------------------------------------|--------------------------|--------------------------|--------------------------|--------------------------|
| Je suis plutôt timide                                                | <input type="checkbox"/> | <input type="checkbox"/> | <input type="checkbox"/> | <input type="checkbox"/> |
| J'ai plein d'énergie                                                 | <input type="checkbox"/> | <input type="checkbox"/> | <input type="checkbox"/> | <input type="checkbox"/> |
| Je pleure facilement                                                 | <input type="checkbox"/> | <input type="checkbox"/> | <input type="checkbox"/> | <input type="checkbox"/> |
| Je suis à l'aise avec des gens que je ne connais pas                 | <input type="checkbox"/> | <input type="checkbox"/> | <input type="checkbox"/> | <input type="checkbox"/> |
| J'aime beaucoup être en groupe                                       | <input type="checkbox"/> | <input type="checkbox"/> | <input type="checkbox"/> | <input type="checkbox"/> |
| Je préfère les jeux calmes, sans mouvements, aux activités physiques | <input type="checkbox"/> | <input type="checkbox"/> | <input type="checkbox"/> | <input type="checkbox"/> |
| Je suis facilement énervé(e)                                         | <input type="checkbox"/> | <input type="checkbox"/> | <input type="checkbox"/> | <input type="checkbox"/> |
| Je cours du matin au soir                                            | <input type="checkbox"/> | <input type="checkbox"/> | <input type="checkbox"/> | <input type="checkbox"/> |
| Je suis plutôt sensible                                              | <input type="checkbox"/> | <input type="checkbox"/> | <input type="checkbox"/> | <input type="checkbox"/> |

## Partie G: Questions pour tes parents

Voici maintenant une série de questions pour tes parents, avant la fin du questionnaire.

**G1.** Quel était votre niveau d'inquiétude en lien avec l'épidémie pendant le confinement ?

|                                                                                                      | Pas du tout              | Un peu                   | Beaucoup                 | Enormément               |
|------------------------------------------------------------------------------------------------------|--------------------------|--------------------------|--------------------------|--------------------------|
| Inquiétude d'être contaminé et de tomber malade                                                      | <input type="checkbox"/> | <input type="checkbox"/> | <input type="checkbox"/> | <input type="checkbox"/> |
| Inquiétude pour vos proches                                                                          | <input type="checkbox"/> | <input type="checkbox"/> | <input type="checkbox"/> | <input type="checkbox"/> |
| Inquiétude pour la scolarité de votre enfant                                                         | <input type="checkbox"/> | <input type="checkbox"/> | <input type="checkbox"/> | <input type="checkbox"/> |
| Nervosité accrue en lien avec le confinement                                                         | <input type="checkbox"/> | <input type="checkbox"/> | <input type="checkbox"/> | <input type="checkbox"/> |
| Manque de confiance dans les autorités publiques pour les prises de décision en lien avec l'épidémie | <input type="checkbox"/> | <input type="checkbox"/> | <input type="checkbox"/> | <input type="checkbox"/> |

**G2.** A la perspective de la reprise scolaire, ressentez-vous des inquiétudes ?

|                                            | Pas du tout              | Un peu                   | Beaucoup                 | Enormément               |
|--------------------------------------------|--------------------------|--------------------------|--------------------------|--------------------------|
| Inquiétude que votre enfant soit contaminé | <input type="checkbox"/> | <input type="checkbox"/> | <input type="checkbox"/> | <input type="checkbox"/> |



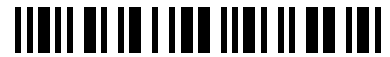

|                                                                                       | Pas du tout              | Un peu                   | Beaucoup                 | Enormément               |
|---------------------------------------------------------------------------------------|--------------------------|--------------------------|--------------------------|--------------------------|
| Inquiétude que votre enfant ramène le virus à la maison                               | <input type="checkbox"/> | <input type="checkbox"/> | <input type="checkbox"/> | <input type="checkbox"/> |
| Inquiétude que les gestes barrières ne soient pas respectés                           | <input type="checkbox"/> | <input type="checkbox"/> | <input type="checkbox"/> | <input type="checkbox"/> |
| Inquiétude logistique pour votre organisation (trajets, reprise du travail, etc)      | <input type="checkbox"/> | <input type="checkbox"/> | <input type="checkbox"/> | <input type="checkbox"/> |
| Inquiétude d'un retard dans les apprentissages de votre enfant pendant le confinement | <input type="checkbox"/> | <input type="checkbox"/> | <input type="checkbox"/> | <input type="checkbox"/> |

**G3. Votre enfant est-il suivi régulièrement par un psychologue, un pédopsychiatre, ou un professionnel de l'enfance ?**

Oui ☐

Non ☐

**G4. Avez-vous été particulièrement préoccupé par la santé psychologique de votre enfant pendant le confinement ?**

Pas du tout ☐

Un peu ☐

Beaucoup ☐

Enormément ☐

**G5. Auriez-vous adressé votre enfant à un professionnel de la santé mentale s'il en avait eu besoin pendant le confinement ?**

|                                                                                      | Sans hésiter             | Eventuellement           | En dernier recours uniquement |
|--------------------------------------------------------------------------------------|--------------------------|--------------------------|-------------------------------|
| Médecin ou professionnel en libéral                                                  | <input type="checkbox"/> | <input type="checkbox"/> | <input type="checkbox"/>      |
| Centre médico-psychologique (CMP) ou autre structure ambulatoire de soins psychiques | <input type="checkbox"/> | <input type="checkbox"/> | <input type="checkbox"/>      |
| Urgences pédiatriques de l'hôpital                                                   | <input type="checkbox"/> | <input type="checkbox"/> | <input type="checkbox"/>      |

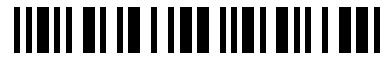

**G6. Votre enfant a répondu à plusieurs questions sur ses ressentis psychologiques pendant le confinement. De votre côté, qu'avez vous perçu de ses comportements et réactions ?**

|                                                                              | Pas du tout              | Un peu                   | Beaucoup                 | Enormément               |
|------------------------------------------------------------------------------|--------------------------|--------------------------|--------------------------|--------------------------|
| J'ai eu l'impression que mon enfant était plus renfermé(e) sur elle/lui-même | <input type="checkbox"/> | <input type="checkbox"/> | <input type="checkbox"/> | <input type="checkbox"/> |
| J'ai trouvé que mon enfant était plus turbulent que d'habitude               | <input type="checkbox"/> | <input type="checkbox"/> | <input type="checkbox"/> | <input type="checkbox"/> |
| Mon enfant semblait plus inquiet que d'habitude                              | <input type="checkbox"/> | <input type="checkbox"/> | <input type="checkbox"/> | <input type="checkbox"/> |
| Mon enfant semblait plus triste que d'habitude                               | <input type="checkbox"/> | <input type="checkbox"/> | <input type="checkbox"/> | <input type="checkbox"/> |
| J'ai eu l'impression que mon enfant a souffert du confinement                | <input type="checkbox"/> | <input type="checkbox"/> | <input type="checkbox"/> | <input type="checkbox"/> |
| Mon enfant semblait plus épanoui pendant le confinement                      | <input type="checkbox"/> | <input type="checkbox"/> | <input type="checkbox"/> | <input type="checkbox"/> |
| Mon enfant semblait moins stressé que lorsqu'il va à l'école                 | <input type="checkbox"/> | <input type="checkbox"/> | <input type="checkbox"/> | <input type="checkbox"/> |

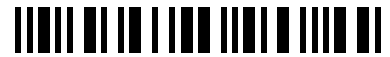

**Merci beaucoup d'avoir participé à ce questionnaire ! Tes réponses sont très précieuses.**

**Voici quelques conseils maintenant que nous pouvons te donner :**

**Le confinement peut constituer une source de stress important pour tous les enfants, puisque les repères habituels sont modifiés (ton quotidien change, tu ne vois plus les mêmes personnes, tu ne fais plus les mêmes activités).**

**Nous te conseillons donc de poser toutes les questions qui t'inquiètent aux adultes autour de toi (tes parents, tes professeurs) ; il est important que tu ne restes pas seul avec tes angoisses. Nous te conseillons aussi de ne pas trop regarder les médias, qui te maintiennent exposé en permanence au stress lié à l'épidémie.**

**Tu peux trouver d'autres conseils sur le site ci-dessous qui comporte beaucoup de documents ressources :**

**<http://cn2r.fr/wp-content/uploads/2020/03/Que-dire-aux-enfants.pdf>**

**Tu peux aussi montrer ces fiches à tes parents.**

**Cette petite BD explicative est également un bon moyen de t'informer sur le coronavirus et ses impacts psychologiques :**

**<http://cn2r.fr/wp-content/uploads/2020/03/Le-Coronavirus-explique%CC%81-par-mon-pe%CC%81dopsychiatre.compressed.pdf>**

**Enfin, en cas de détresse psychologique (si tu n'arrives plus à gérer tes angoisses ou ta tristesse, que tu ne dors plus, que tu penses toute la journée à l'épidémie, que tes activités habituelles ne te font plus du tout plaisir, ou encore que tu as des réactions incontrôlées sans comprendre pourquoi), il est essentiel que tu puisses rencontrer un professionnel de la santé mentale.**

**Tu peux te tourner vers l'infirmière scolaire de ton école, ou tes parents peuvent téléphoner au Centre Médico-Psychologique de la ville où tu habites.**

**En cas de détresse psychologique intense (si tu as des idées noires, ou que tu fais une crise d'angoisse incontrôlable), il faut que tu demandes à tes proches de t'emmener aux urgences de l'hôpital le plus proche, ou appeler le 15.**

|                                                                                                                                                                                                                                                                                                                                                                                               | N = 7218 (%)                                                                                                                                                                                                          |
|-----------------------------------------------------------------------------------------------------------------------------------------------------------------------------------------------------------------------------------------------------------------------------------------------------------------------------------------------------------------------------------------------|-----------------------------------------------------------------------------------------------------------------------------------------------------------------------------------------------------------------------|
| <b>Gender</b> <ul style="list-style-type: none"> <li>Female</li> <li>Male</li> <li>Missing data</li> </ul>                                                                                                                                                                                                                                                                                    | 3774 (52.3)<br>3339 (46.3)<br>105 (1.5)                                                                                                                                                                               |
| <b>Academic Level</b> (US equivalent of French system) <ul style="list-style-type: none"> <li>PrimarySchool 1st Grade<br/> 2nd Grade<br/> 3rd Grade<br/> 4th Grade<br/> 5th Grade </li> <li>Middle School 6th Grade<br/> 7th Grade<br/> 8th Grade<br/> 9th Grade (middle school in France) </li> <li>High School 10th Grade<br/> 11th Grade<br/> 12th Grade </li> <li>Missing data</li> </ul> | 2852 (39.5)<br>583 (8.1)<br>534 (7.4)<br>583 (8.1)<br>621 (8.6)<br>531 (7.4)<br>3139 (43.5)<br>901 (12.5)<br>859 (11.9)<br>780 (10.8)<br>599 (8.3)<br>1112 (15.4)<br>378 (5.2)<br>426 (5.9)<br>308 (4.3)<br>115 (1.6) |
| <b>Level of stress</b> <ul style="list-style-type: none"> <li>Higher</li> <li>Unchanged</li> <li>Lower</li> <li>Missing data</li> </ul>                                                                                                                                                                                                                                                       | 2028 (28.1)<br>2648 (36.7)<br>2401 (33.3)<br>141 (2.0)                                                                                                                                                                |
| <b>Profession Parent 1</b> <ul style="list-style-type: none"> <li>No professional activity,</li> <li>Craftsmen, traders, farmers, and entrepreneurs</li> <li>Executives and higher intellectual professions</li> <li>Employee / workforce</li> <li>Intermediary profession</li> <li>Missing data</li> </ul>                                                                                   | 333 (4.6)<br>633 (8.8)<br>1046 (14.5)<br>2622 (36.3)<br>2131 (29.5)<br>453 (6.3)                                                                                                                                      |
| <b>Profession Parent 2</b> <ul style="list-style-type: none"> <li>No professional activity,</li> <li>Craftsmen, traders, farmers, and entrepreneurs</li> <li>Executives and higher intellectual professions</li> <li>Employee / workforce</li> <li>Intermediary profession</li> <li>Missing data</li> </ul>                                                                                   | 669 (9.2)<br>362 (5.0)<br>815 (11.3)<br>2553 (35.4)<br>1852 (25.7)                                                                                                                                                    |
| <b>Members of the household</b> <ul style="list-style-type: none"> <li>Mother</li> <li>Father</li> <li>Sibling</li> <li>Step-father / Step-mother</li> </ul>                                                                                                                                                                                                                                  | 6279 (87.0)<br>4827 (66.9)<br>5052 (70.0)                                                                                                                                                                             |

|                                                                                                                                                                                                                                                                                                                                                                                                                                                                                                                                                                                                                                                                                                                                                                                                                                                                                                                                                                                               |                                                                                                                                                                                                                                                                           |
|-----------------------------------------------------------------------------------------------------------------------------------------------------------------------------------------------------------------------------------------------------------------------------------------------------------------------------------------------------------------------------------------------------------------------------------------------------------------------------------------------------------------------------------------------------------------------------------------------------------------------------------------------------------------------------------------------------------------------------------------------------------------------------------------------------------------------------------------------------------------------------------------------------------------------------------------------------------------------------------------------|---------------------------------------------------------------------------------------------------------------------------------------------------------------------------------------------------------------------------------------------------------------------------|
| <ul style="list-style-type: none"> <li>• Grand-parents</li> <li>• Missing data</li> </ul>                                                                                                                                                                                                                                                                                                                                                                                                                                                                                                                                                                                                                                                                                                                                                                                                                                                                                                     | 537 (7.4)<br>255 (3.5)<br>@@@                                                                                                                                                                                                                                             |
| <b>Type of lodging</b> <ul style="list-style-type: none"> <li>• House with exterior</li> <li>• House without exterior</li> <li>• Apartment with Exterior</li> <li>• Apartment without exterior</li> <li>• House</li> <li>• Apartment</li> <li>• With exterior</li> <li>• Without exterior</li> <li>• Missing Data</li> </ul>                                                                                                                                                                                                                                                                                                                                                                                                                                                                                                                                                                                                                                                                  | 5671 (78.6)<br>129 (1.8)<br>965 (13.4)<br>311 (4.3)                                                                                                                                                                                                                       |
| <b>Activities During Lockdown</b> <ul style="list-style-type: none"> <li>• Physical activity in exterior <ul style="list-style-type: none"> <li>• Yes</li> <li>• No</li> </ul> </li> <li>• Gardening <ul style="list-style-type: none"> <li>• Yes</li> <li>• No</li> </ul> </li> <li>• Playingboardgames <ul style="list-style-type: none"> <li>• Yes</li> <li>• No</li> </ul> </li> <li>• Cooking <ul style="list-style-type: none"> <li>• Yes</li> <li>• No</li> </ul> </li> <li>• Reading <ul style="list-style-type: none"> <li>• Yes</li> <li>• No</li> </ul> </li> <li>• Drawing <ul style="list-style-type: none"> <li>• Yes</li> <li>• No</li> </ul> </li> <li>• Playing Video Games <ul style="list-style-type: none"> <li>• Yes</li> <li>• No</li> </ul> </li> <li>• Playing an intrument <ul style="list-style-type: none"> <li>• Yes</li> <li>• No</li> </ul> </li> <li>• Chatting With Friends <ul style="list-style-type: none"> <li>• Yes</li> <li>• No</li> </ul> </li> </ul> | 5365 (74.3)<br>1853 (25.7)<br>2775 (38.4)<br>4971 (68.9)<br>3270 (45.3)<br>3948 (54.7)<br>4394 (60.9)<br>2824 (39.1)<br>3840 (53.2)<br>3378 (46.8)<br>3349 (46.4)<br>3869 (53.6)<br>4612 (63.9)<br>2606 (36.1)<br>818 (11.3)<br>6400 (88.7)<br>4018 (55.7)<br>3200 (44.3) |
| <b>Categories</b> <ul style="list-style-type: none"> <li>• Physical activity</li> <li>• Creative or artistic activity</li> <li>• Intellectual Activity</li> <li>• Screen use</li> </ul>                                                                                                                                                                                                                                                                                                                                                                                                                                                                                                                                                                                                                                                                                                                                                                                                       | 6047 (83.8)<br>3740 (54.8)<br>3846 (53.3)<br>4758 (65.9)                                                                                                                                                                                                                  |
| <b>(No other activity than screen use)</b>                                                                                                                                                                                                                                                                                                                                                                                                                                                                                                                                                                                                                                                                                                                                                                                                                                                                                                                                                    | 107 (1.5)                                                                                                                                                                                                                                                                 |
| <b>Screen Time for school purposes</b> <ul style="list-style-type: none"> <li>• &lt; 30 min</li> </ul>                                                                                                                                                                                                                                                                                                                                                                                                                                                                                                                                                                                                                                                                                                                                                                                                                                                                                        | 932 (12.9)                                                                                                                                                                                                                                                                |

|                                                                                                                                                                               |                                                        |
|-------------------------------------------------------------------------------------------------------------------------------------------------------------------------------|--------------------------------------------------------|
| <ul style="list-style-type: none"> <li>• 30 min to 2hrs</li> <li>• 2hrs to 4hrs</li> <li>• &gt; 4 hrs</li> </ul>                                                              | 3096 (42.9)<br>2003 (27.8)<br>1029 (14.3)              |
| <b>Screen Time for leisure time</b><br>- < 30 min<br>- 30 min to 2hrs<br>- 2hrs to 4hrs<br>- > 4 hrs                                                                          | 339 (4.7)<br>2924 (40.5)<br>2213 (30.7)<br>1536 (21.3) |
| <b>Sleeping pattern</b> <ul style="list-style-type: none"> <li>• As usual</li> <li>• Little altered</li> <li>• Very much altered</li> <li>• Missing data</li> </ul>           | 950 ( 13.2)<br>3769 (52.2)<br>2375 (32.9)<br>124 (1.7) |
| <b>Stress confinement</b> <ul style="list-style-type: none"> <li>• As usual</li> <li>• Less stressed</li> <li>• More stressed</li> <li>• Missing data</li> </ul>              | 2648 (36.7)<br>2401 (33.3)<br>2028 (28.1)<br>141 (2.0) |
| <b>WORRY ABOUT BECOMING ILL</b> <ul style="list-style-type: none"> <li>• Not at all</li> <li>• A little</li> <li>• Very much</li> <li>• Missing data</li> </ul>               | 3061 (42.4)<br>3078 (42.6)<br>922 (12.8)<br>157 (2.2)  |
| <b>WORRY ABOUT FAMILY MEMBER BECOMING ILL</b> <ul style="list-style-type: none"> <li>• Not at all</li> <li>• A little</li> <li>• Very much</li> <li>• Missing data</li> </ul> | 944 (13.1)<br>3105 (43.0)<br>3014 (41.8)<br>155 (2.1)  |
| <b>WORRY ABOUT LOCKDOWN DURATION</b> <ul style="list-style-type: none"> <li>• Not at all</li> <li>• A little</li> <li>• Very much</li> <li>• Missing data</li> </ul>          | 2641 (36.6)<br>2242 (31.1)<br>2160 (29.9)<br>175 (2.4) |
| <b>WORRY ABOUT ACADEMIC LEARNINGS</b> <ul style="list-style-type: none"> <li>• Not at all</li> <li>• A little</li> <li>• Very much</li> <li>• Missing data</li> </ul>         | 2963 (41.1)<br>2614 (36.2)<br>1471 (20.4)<br>170 (2.4) |
| <b>LESS EFFICIENT in their SCHOOL WORK</b> <ul style="list-style-type: none"> <li>• No</li> <li>• Yes</li> </ul>                                                              | 5140 (71.2)<br>2078 (28.8)                             |
| <b>LESS MOTIVATED in their SCHOOL WORK</b> <ul style="list-style-type: none"> <li>• No</li> <li>• Yes</li> </ul>                                                              | 4559 (63.2)<br>2659 (36.8)                             |

|                                                                                                                                                                              |                                                        |
|------------------------------------------------------------------------------------------------------------------------------------------------------------------------------|--------------------------------------------------------|
| <b>SAD to be SEPARATED FROM FRIENDS</b> <ul style="list-style-type: none"> <li>No</li> <li>Yes</li> </ul>                                                                    | 2344 (32.5)<br>4874 (67.5)                             |
| <b>FEELS LONELY</b> <ul style="list-style-type: none"> <li>No</li> <li>Yes</li> </ul>                                                                                        | 5886 (81.5)<br>1332 (18.5)                             |
| <b>FEELS BORED</b> <ul style="list-style-type: none"> <li>No</li> <li>Yes</li> </ul>                                                                                         | 4322 (59.9)<br>2896 (40.1)                             |
| <b>SENSE MORE TENSION AT HOME</b> <ul style="list-style-type: none"> <li>No</li> <li>Yes</li> </ul>                                                                          | 5984 (82.9)<br>1234 (17.1)                             |
| <b>FEELESS ACADEMIC PRESSURE</b> <ul style="list-style-type: none"> <li>No</li> <li>Yes</li> </ul>                                                                           | 4508 (62.5)<br>2710 (37.5)                             |
| <b>ENJOY MORE FAMILY TIME</b> <ul style="list-style-type: none"> <li>No</li> <li>Yes</li> </ul>                                                                              | 2419 (33.5)<br>4799 (66.5)                             |
| <b>ENJOY LESS SCHOOL ALTERCATIONS</b> <ul style="list-style-type: none"> <li>No</li> <li>Yes</li> </ul>                                                                      | 6224 (86.2)<br>994 (13.8)                              |
| <b>FEEL SUPPORTED by their PARENTS</b> <ul style="list-style-type: none"> <li>Not at all</li> <li>A little</li> <li>Very much</li> <li>Missing data</li> </ul>               | 552 (7.6)<br>2129 (29.5)<br>4396 (60.9)<br>141 (2.0)   |
| <b>WORRY about BEING CONTAMINATED</b> <ul style="list-style-type: none"> <li>Not at all</li> <li>A little</li> <li>Very much</li> <li>Missing data</li> </ul>                | 3495 (48.4)<br>2585 (35.8)<br>966 (13.4)<br>172 (2.4)  |
| <b>WORRY about BRINGING THE VIRUS HOME</b> <ul style="list-style-type: none"> <li>Not at all</li> <li>A little</li> <li>Very much</li> <li>Missing data</li> </ul>           | 2451 (34.0)<br>2606 (36.1)<br>1976 (27.4)<br>185 (2.6) |
| <b>Worry About Falling Behind In School Learning</b> <ul style="list-style-type: none"> <li>Not at all</li> <li>A little</li> <li>Very much</li> <li>Missing data</li> </ul> | 3146 (43.6)<br>2531(35.1)<br>1365 (18.9)<br>176 (2.4)  |

|                                                                                                                                                                                     |                                                        |
|-------------------------------------------------------------------------------------------------------------------------------------------------------------------------------------|--------------------------------------------------------|
| <b>WORRY about BEING SEPARATED from FAMILY</b> <ul style="list-style-type: none"> <li>• Not at all</li> <li>• A little</li> <li>• Very much</li> <li>• Missing data</li> </ul>      | 3975 (55.1)<br>2174 (30.1)<br>866 (12.0)<br>203 (2.8)  |
| <b>RELIEF about LEAVING the HOUSE</b> <ul style="list-style-type: none"> <li>• Not at all</li> <li>• A little</li> <li>• Very much</li> <li>• Missing data</li> </ul>               | 625 (8.7)<br>1701 (23.6)<br>4699 (65.1)<br>193 (2.7)   |
| <b>RELIEF about GETTING AWAY from FAMILY</b> <ul style="list-style-type: none"> <li>• Not at all</li> <li>• A little</li> <li>• Very much</li> <li>• Missing data</li> </ul>        | 3581 (49.6)<br>2524 (35.0)<br>902 (12.5)<br>211 (2.9)  |
| <b>RELIEF about BEING GUIDED in their LEARNINGS</b> <ul style="list-style-type: none"> <li>• Not at all</li> <li>• A little</li> <li>• Very much</li> <li>• Missing data</li> </ul> | 1462 (20.3)<br>2914 (40.4)<br>2637 (36.5)<br>205 (2.8) |
| <b>GLAD to RESUME ACTIVITIES</b> <ul style="list-style-type: none"> <li>• Not at all</li> <li>• A little</li> <li>• Very much</li> <li>• Missing data</li> </ul>                    | 708 (9.8)<br>2350 (32.6)<br>3973 (55.0)<br>187 (2.6)   |
| <b>WORRY about CHILD HEALTH</b> <ul style="list-style-type: none"> <li>• Not at all</li> <li>• A little</li> <li>• Very much</li> <li>• Missing data</li> </ul>                     | 3454 (47.9)<br>2484 (34.4)<br>1035 (14.3)<br>245 (3.4) |
| <b>REPORT CHILD WITHDRAWN</b> <ul style="list-style-type: none"> <li>• Not at all</li> <li>• A little</li> <li>• Very much</li> <li>• Missing data</li> </ul>                       | 5317 (73.7)<br>1241 (17.2)<br>413 (5.7)<br>247 (3.4)   |
| <b>REPORT CHILD having BEHAVIORAL DIFFICULTIES</b> <ul style="list-style-type: none"> <li>• Not at all</li> <li>• A little</li> <li>• Very much</li> <li>• Missing data</li> </ul>  | 5096 (70.6)<br>1426 (19.8)<br>449 (6.2)<br>247 (3.4)   |
| <b>REPORT CHILD being WORRIED</b> <ul style="list-style-type: none"> <li>• Not at all</li> <li>• A little</li> <li>• Very much</li> <li>• Missing data</li> </ul>                   | 3972 (55.0)<br>2345 (32.5)<br>652 (9.0)<br>249 (3.4)   |



|                                                                                                                                                                                                                             |                                                                                                                                                    |
|-----------------------------------------------------------------------------------------------------------------------------------------------------------------------------------------------------------------------------|----------------------------------------------------------------------------------------------------------------------------------------------------|
| <b>REPORT CHILD being SAD</b> <ul style="list-style-type: none"> <li>• Not at all</li> <li>• A little</li> <li>• Very much</li> <li>• Missing data</li> </ul>                                                               | 4838 (67.0)<br>1642 (22.7)<br>474 (6.6)<br>264 (3.7)                                                                                               |
| <b>REPORT CHILD SUFFERING</b> <ul style="list-style-type: none"> <li>• Not at all</li> <li>• A little</li> <li>• Very much</li> <li>• Missing data</li> </ul>                                                               | 3729 (51.7)<br>2593 (35.9)<br>644 (8.9)<br>252 (3.5)                                                                                               |
| <b>REPORT CHILD HAPPY</b> <ul style="list-style-type: none"> <li>• Not at all</li> <li>• A little</li> <li>• Very much</li> <li>• Missing data</li> </ul>                                                                   | 3487 (48.3)<br>2163 (30.0)<br>1297 (18.0)<br>271 (3.8)                                                                                             |
| <b>REPORT CHILD LESS STRESSED</b> <ul style="list-style-type: none"> <li>• Not at all</li> <li>• A little</li> <li>• Very much</li> <li>• Missing data</li> </ul>                                                           | 2921 (40.5)<br>2254 (31.2)<br>1784 (24.7)<br>259 (3.6)                                                                                             |
| <b>EMOTIONAL SCORE</b> <ul style="list-style-type: none"> <li>• 0</li> <li>• 1</li> <li>• 2</li> <li>• 3</li> <li>• 4</li> <li>• 5</li> <li>• 6</li> <li>• 7</li> <li>• 8</li> <li>• 9</li> <li>• Missing data</li> </ul>   | 160 (2.2)<br>280 (3.9)<br>653 (9.0)<br>1053 (14.6)<br>1297 (18.0)<br>1313 (18.2)<br>1037 (14.4)<br>641 (8.9)<br>405 (5.6)<br>190 (2.6)<br>89 (2.6) |
| <b>SOCIABILITY SCORE</b> <ul style="list-style-type: none"> <li>• 0</li> <li>• 1</li> <li>• 2</li> <li>• 3</li> <li>• 4</li> <li>• 5</li> <li>• 6</li> <li>• 7</li> <li>• 8</li> <li>• 9</li> <li>• Missing data</li> </ul> | 66 (0.9)<br>203 (2.8)<br>426 (5.9)<br>844 (11.7)<br>1276 (17.7)<br>1271 (17.6)<br>1284 (17.8)<br>942 (13.1)<br>480 (6.7)<br>228 (3.2)<br>198 (2.7) |
| <b>ACTIVITY SCORE</b> <ul style="list-style-type: none"> <li>• 0</li> <li>• 1</li> </ul>                                                                                                                                    | 32 (0.4)<br>129 (1.8)                                                                                                                              |

|                |             |
|----------------|-------------|
| • 2            | 360 (5.0)   |
| • 3            | 614 (8.5)   |
| • 4            | 1085 (15.0) |
| • 5            | 1417 (19.6) |
| • 6            | 1339 (18.6) |
| • 7            | 945 (13.1)  |
| • 8            | 681 (9.4)   |
| • 9            | 399 (5.5)   |
| • Missing data | 217 (3.0)   |
